# Supplementary material for: 3D image analysis reveals differences of CD30 positive cells and network formation in reactive and malignant human lymphoid tissue (classical Hodgkin Lymphoma)
Source: PLoS One. 2019 Oct 24;14(10):e0224156. doi: 10.1371/journal.pone.0224156 (PMC6812863; doi:10.1371/journal.pone.0224156)
Supplement: S1 Table — (XLS) [file pone.0224156.s001.xls]

## Sheet: Sheet1
Case	Diagnose	Amount of objects	Absolute volume in µm³	Absolute CD30-Surface in μm²	Absolute CD30-Volume in µm³	Percentage share CD30 has of the absolute volume	Volume/Surface	Surface/Volume	Thickness of the section in μm	Amount of networks	Average cell count per network	Volume of the networks in µm³	Amount of single cells	Average surface of a single cell in μm²	Average volume of single cell in µm³
1	Adenoid	170	3.10553e+06	31959.9	16749.7	0.54	0.52	1.9	23.7	0	0	0	44	690	379.5
2	Adenoid	346	3574080	91313.8	48988.9	1.37	0.54	1.864	27.2	3	7	7402.87	90	590.19	344.17
3	Adenoid	400	3.70039e+06	137695	80564.8	2.18	0.59	1.709	27.7	6	5	15704	82	825.34	493.3
4	Adenoid	239	3294192	57209.2	35002.8	1.06	0.61	1.634	24	2	4	3099.64	56	660.48	431.13
5	Adenoid	305	2.96603e+06	123460	66297.6	2.24	0.54	1.86221	22.7	9	5.5	26232.6	65	891.23	450.51
6	Adenoid	282	4.44379e+06	132112	75999.8	1.71	0.58	1.73832	32.2	11	5	8890.1	41	876.53	489.97
7	Adenoid	398	4278092	249178	130924	3.06	0.53	1.90322	32.2	25	5.5	74557.1	61	1129.88	578.49
8	Adenoid	508	3.7026e+06	184295	101748	2.75	0.55	1.81129	28.1	11	6	33587	53	843.31	475.35
9	Adenoid	150	3.33558e+06	62023.3	42857	1.28	0.69	1.44722	25.6	5	4	24273.1	32	523.52	327.74
10	Adenoid	121	2325780	130091	87704	3.77	0.67	1.4833	17.7	8	6.5	36322.8	58	972.75	608.6
11	LAD	449	4045032	300757	193950	4.79	0.64	1.55	30.7	32	4	90822	101	852.95	541.5
12	LAD	87	4003104	96354.9	68789.5	1.72	0.71	1.401	29.4	4	3	9424.27	54	1060.77	783.75
13	LAD	162	2.74258e+06	31326.9	17131	0.06	0.55	1.82867	20.7	1	3	411	36	611.8	366.51
14	LAD	84	3180683	16479	7671.21	0.24	0.47	2.14816	23.3	0	0	0	38	354.72	173.76
15	LAD	242	2.49564e+06	75997.8	47129.9	1.89	0.62	1.61252	19.1	3	5	487.52	49	835.61	527.43
16	LAD	513	3410560	159047	87098.8	2.55	0.55	1.82605	25.6	15	4	25053	90	679.73	397.41
17	LAD	77	3.26171e+06	95392.4	59132.5	1.81	0.62	1.613	23.7	7	3	15841.2	31	1091.04	724.87
18	LAD	38	3.48273e+06	6326.03	4492.88	0.13	0.71	1.40801	25.1	0	0	0	16	252.53	192.87
19	LAD	195	3529812	58796.5	39618.4	1.12	0.67	1.48407	26	2	4.5	9131.26	32	928.4	634.38
20	LAD	127	4076325	43604	27044	0.66	0.62	1.61233	29.7	2	3.5	3343.38	32	645.74	399.67
21	MccHL	217	2.34154e+06	108874	69181.4	2.95	0.64	1.57	17.2	8	4	22387.8	55	952.77	618.12
22	MccHL	255	4.61269e+06	224678	208143	4.51	0.93	1.079	33.7	15	7	144510	32	1482.53	1299.37
23	MccHL	88	2.84124e+06	65650.3	46274.9	1.63	0.7	1.419	20.7	0	0	0	34	1637.41	1183.24
24	MccHL	100	3.85695e+06	37174.3	27712.5	0.72	0.75	1.341	28.1	0	0	0	30	884.62	719.3
25	MccHL	281	3999743	339118	258499	6.46	0.76	1.31187	29.7	25	5.5	167574	56	1421.41	1050.74
26	MccHL	204	5.02331e+06	160545	124095	2.47	0.77	1.29373	36.7	8	4.5	38400.8	66	1271.45	996.78
27	MccHL_EBV	81	3.80471e+06	610.24	574.71	0.02	0.94	1.06182	28.1	0	0	0	23	1887.63	1898.91
28	MccHL_EBV	384	4.55697e+06	268057	176144	3.87	0.66	1.522	33.2	20	4	65667.9	104	1221.35	807.68
29	MccHL_EBV	231	3484800	154600	128114	3.68	0.83	1.20673	25.6	6	3.5	26670.6	63	1464.57	1258.08
30	MccHL_EBV	125	4.93942e+06	113706	93131.2	1.89	0.82	1.22092	35.7	2	3	8725.19	40	2151.47	1832.29
31	MccHL_EBV	188	3.67459e+06	83601.8	63912.4	1.74	0.76	1.30807	26.7	0	0	0	50	1078.78	876.71
32	NscHL	292	3.51396e+06	110616	83671	2.38	0.5	1.32204	25.6	3	5.5	17198.1	43	1226.56	1047.77
33	NscHL	265	3.60609e+06	314930	157540	4.37	0.5	1.99904	26.2	18	12	144008	15	993.63	443.46
34	NscHL	324	3.16034e+06	385195	304114	9.62	0.79	1.26662	22.9	24	19	266454	40	856.83	533.13
35	NscHL	290	3.35332e+06	459920	324927	9.69	0.71	1.41546	24.7	19	20	279955	37	1278.56	880.04
36	NscHL	126	6.0576e+06	193209	136674	2.26	0.71	1.41365	21.2	11	8.5	69544.7	67	1066.05	698.42
37	NscHL	356	2.47105e+06	281866	166285	6.73	0.59	1.69508	18.2	14	17	133962	32	980.03	487.52
38	NscHL	421	3211650	353480	233740	7.28	0.66	1.51228	23.4	26	10	192558	34	979.46	636.77
39	NscHL	517	2.66001e+06	220059	143160	5.38	0.65	1.53715	19.7	16	6.5	74399.3	68	982.48	622.06
40	NscHL	525	3.29726e+06	377406	225234	6.83	0.6	1.67561	23.7	22	13	176937	54	996.54	561.41
41	NscHL	342	2511784	214055	135222	5.38	0.63	1.58299	18.4	18	6	85553.4	30	1218.45	811.6
